# Supplementary material for: Contribution of host species and pathogen clade to snake fungal disease hotspots in Europe
Source: PubMed Central journal article supplement (PMC11006896; doi:10.1038/s42003-024-06092-x), 2024-04-10
Supplement: 42003_2024_6092_MOESM2_ESM.pdf [file 42003_2024_6092_MOESM2_ESM.pdf]

## **Supporting information**

**Supplementary Table 1.** Summary of all figures, tables and corresponding statistical analyses.

| Figure | Table | Distribution | Response variable                                           | Population-effect                        | Group-effect   |
|--------|-------|--------------|-------------------------------------------------------------|------------------------------------------|----------------|
| S2     | -     | Bernoulli    | Pathogen detection on snakes (0 1)                          | Julian date of each snake's capture date | Species + Site |
| 1b     | S3    | Bernoulli    | Pathogen detection on snakes (0 1)                          | Site                                     | Species        |
| N/A    | N/A   | Beta         | Site prevalence                                             | Average SVL for each snake species       | Species        |
| N/A    | N/A   | Bernoulli    | Pathogen detection on snakes (0 1)                          | Genus                                    | Site           |
| 2      | S4    | Bernoulli    | Pathogen detection on snakes (0 1)                          | Species                                  | Site           |
| 3a     | -     | Bernoulli    | Lesion observed (0 1)                                       | Species                                  | Site           |
| 3b     | S5    | Beta         | Proportion of total surface area of snake covered in lesion | Species                                  | Site           |
| 4b     | S7    | Bernoulli    | Pathogen detection on snakes (0 1)                          | Clade * Species                          | Site           |
| S5     | -     | Beta         | Proportion of total surface area of snake covered in lesion | Clade                                    | Species        |

**Supplementary Table 2.** Description of sites, species and sample sizes across all 10 countries sampled from March 2020 to June 2022 for the presence of *Ophidiomyces ophidiicola*, the pathogen responsible for Snake Fungal Disease. The 4-letter codes represent genus and species for each snake species sampled as follows: *Coronella austriaca* (COAU), *Coronella girondica* (COGI), *Dolichophis caspius* (DOCA), *Elaphe sauromates* (ELSA), *Hierophis viridiflavus* (HIVI), *Malpolon monspessulanus* (MAMO), *Natrix astreptophora* (NAAS), *Natrix helvetica* (NAHE), *Natrix natrix* (NANA), *Natrix maura* (NAMA), *Natrix tessellata* (NATE), *Vipera ammodytes* (VIAM), *Vipera aspis* (VIAS), *Vipera berus* (VIBE), *Vipera latastei* (VILA), *Vipera nikolskii* (VINI), *Vipera renardi* (VIRE), *Vipera seoanei* (VISE), *Vipera ursini* (VIUR), *Zamenis longissimus* (ZALO), *Zamenis scalaris* (ZASC). For each species, the numbers within each cell represent: total number of snakes with skin lesion / total number of snakes testing positive by qPCR / total number of snakes sampled. The latitudinal and longitudinal ranges for each site are provided in decimal degrees.

**AUSTRIA (n = 76)**

| <u>Site</u> | <u>Latitudinal range</u> | <u>Longitudinal range</u> | <u>Species</u> |             |             |             |             |
|-------------|--------------------------|---------------------------|----------------|-------------|-------------|-------------|-------------|
|             |                          |                           | <u>COAU</u>    | <u>NANA</u> | <u>NATE</u> | <u>VIAM</u> | <u>ZALO</u> |
| Aus1        | 48.18-48.15              | 16.49-16.55               | -              | -           | 2/3/3       | -           | -           |
| Aus2        | 48.04-47.80              | 16.08-16.22               | 0/0/2          | -           | 0/4/20      | 0/0/7       | 0/0/5       |
| Aus3        | 48.71-48.72              | 15.65-15.66               | -              | 2/0/18      | -           | -           | -           |
| Aus4        | 48.15-48.14              | 16.68-16.70               | 1/0/1          | 1/0/8       | -           | -           | 1/0/3       |
| Aus5        | 47.38-47.25              | 14.92-15.16               | -              | 0/1/5       | -           | -           | 0/0/4       |

**CZECH REP (n = 100)**

| <u>Site</u> | <u>Latitudinal range</u> | <u>Longitudinal range</u> | <u>Species</u> |             |             |             |             |
|-------------|--------------------------|---------------------------|----------------|-------------|-------------|-------------|-------------|
|             |                          |                           | <u>COAU</u>    | <u>NANA</u> | <u>NATE</u> | <u>VIBE</u> | <u>ZALO</u> |
| Cz1         | 50.39-50.34              | 13.28-13.37               | -              | 0/0/1       | 0/0/17      | -           | 0/0/8       |
| Cz2         | 50.43-50.32              | 12.82-13.08               | 4/1/19         | 2/1/14      | -           | 0/0/9       | 3/3/32      |

**FRANCE (n = 227)**

| <u>Site</u> | <u>Latitudinal range</u> | <u>Longitudinal range</u> | <u>Species</u> |             |             |             |             |             |             |
|-------------|--------------------------|---------------------------|----------------|-------------|-------------|-------------|-------------|-------------|-------------|
|             |                          |                           | <u>COAU</u>    | <u>HIVI</u> | <u>NAHE</u> | <u>NAMA</u> | <u>VIAS</u> | <u>VIBE</u> | <u>ZALO</u> |
| Fr1         | 47.78-47.38              | -1.87/-1.67               | 0/0/2          | -           | 0/0/25      | -           | 0/0/10      | 0/0/14      | 0/0/40      |
| Fr2         | 47.77-47.59              | 6.39-6.76                 | 0/0/1          | -           | -           | -           | -           | -           | -           |
| Fr3         | 47.15-47.36              | 6.68-6.87                 | 1/0/1          | -           | -           | -           | 0/0/6       | -           | -           |
| Fr4         | 47.32-47.27              | 6.12-6.27                 | -              | 0/0/6       | 0/0/4       | 1/0/17      | -           | -           | 2/0/17      |
| Fr5         | 47.20-47.09              | 6.44-6.72                 | 0/0/1          | -           | -           | -           | 0/0/5       | -           | -           |
| Fr6         | 46.61-46.47              | 5.70-6.02                 | 0/0/1          | -           | -           | -           | -           | -           | -           |
| Fr7         | 46.34-46.24              | 5.52-5.68                 | 0/0/2          | 0/0/2       | -           | -           | -           | -           | -           |
| Fr8         | 47.25-46.81              | 5.65-6.24                 | 4/0/8          | 3/2/10      | 1/0/10      | 0/0/8       | 0/0/5       | 0/0/10      | 8/5/22      |

**GERMANY (n = 64)**

| <u>Site</u> | <u>Latitudinal range</u> | <u>Longitudinal range</u> | <u>Species</u> |             |             |             |             |             |
|-------------|--------------------------|---------------------------|----------------|-------------|-------------|-------------|-------------|-------------|
|             |                          |                           | <u>COAU</u>    | <u>NAHE</u> | <u>NANA</u> | <u>NATE</u> | <u>VIBE</u> | <u>ZALO</u> |
| Ger1        | 48.66-48.49              | 13.39-13.76               | -              | -           | -           | 4/5/11      | -           | 2/0/3       |
| Ger2        | 48.30-48.14              | 12.71-13.08               | 0/0/1          | -           | -           | -           | -           | -           |
| Ger3        | 47.84-47.61              | 11.98-12.47               | -              | 2/0/3       | -           | -           | 0/0/1       | -           |
| Ger4        | 48.20-48.12              | 11.30-11.51               | -              | -           | 0/0/13      | -           | -           | -           |
| Ger5        | 47.73-47.58              | 11.08-11.30               | -              | -           | -           | -           | 0/0/1       | -           |
| Ger6        | 48.03-47.76              | 11.22-11.45               | 0/0/2          | -           | 1/2/16      | -           | 1/1/13      | -           |

**HUNGARY (n = 84)**

| <u>Site</u> | <u>Latitudinal range</u> | <u>Longitudinal range</u> | <u>Species</u> |             |             |             |             |             |             |
|-------------|--------------------------|---------------------------|----------------|-------------|-------------|-------------|-------------|-------------|-------------|
|             |                          |                           | <u>COAU</u>    | <u>DOCA</u> | <u>NANA</u> | <u>NATE</u> | <u>VIBE</u> | <u>VIUR</u> | <u>ZALO</u> |
| Hun1        | 48.29-48.14              | 21.25-21.54               | -              | -           | 0/0/2       | 0/0/5       | -           | -           | -           |
| Hun2        | 48.09-47.99              | 18.85-19.09               | 0/0/3          | 0/0/1       | 0/0/3       | -           | -           | -           | 0/0/1       |
| Hun3        | 47.14-46.94              | 19.18-19.52               | 1/0/3          | -           | 0/0/7       | -           | -           | 0/0/8       | -           |
| Hun4        | 47.60-47.41              | 18.96-19.31               | 0/0/1          | 1/0/11      | -           | 4/2/19      | -           | -           | 0/1/3       |
| Hun5        | 47.85-47.60              | 17.14-17.54               | -              | -           | -           | -           | -           | 0/0/6       | -           |
| Hun6        | 47.42-47.20              | 17.07-17.41               | -              | -           | -           | -           | 0/0/1       | -           | -           |
| Hun7        | 46.40-46.20              | 17.06-17.38               | -              | -           | 0/0/5       | -           | 0/0/5       | -           | -           |

**POLAND (n = 185)**

| <u>Site</u> | <u>Latitudinal range</u> | <u>Longitudinal range</u> | <u>Species</u> |             |             |             |
|-------------|--------------------------|---------------------------|----------------|-------------|-------------|-------------|
|             |                          |                           | <u>COAU</u>    | <u>NANA</u> | <u>NATE</u> | <u>ZALO</u> |
| Pol1        | 53.15-52.95              | 17.78-18.20               | 2/0/12         | 0/0/15      | -           | -           |
| Pol2        | 51.44-51.30              | 15.46-15.80               | 0/0/2          | -           | -           | -           |
| Pol3        | 51.25-51.05              | 16.86-17.25               | -              | 1/0/1       | -           | -           |
| Pol4        | 50.59-50.44              | 17.90-18.23               | 3/0/21         | 0/0/3       | -           | -           |
| Pol5        | 49.87-49.72              | 18.43-18.78               | -              | -           | 0/0/11      | -           |

|      |             |             |         |        |   |        |
|------|-------------|-------------|---------|--------|---|--------|
| Pol6 | 50.47-50.02 | 21.20-21.82 | 0/0/2   | -      | - | -      |
| Pol7 | 50.11-49.95 | 19.77-20.12 | 11/0/21 | 7/0/46 | - | -      |
| Pol8 | 49.32-49.14 | 22.35-22.80 | -       | 4/4/10 | - | 3/1/41 |

**PORTUGAL (n = 54)**

| <u>Site</u> | <u>Latitudinal range</u> | <u>Longitudinal range</u> | <u>Species</u> |             |             |             |             |             |
|-------------|--------------------------|---------------------------|----------------|-------------|-------------|-------------|-------------|-------------|
|             |                          |                           | <u>COAU</u>    | <u>MAMO</u> | <u>NAAS</u> | <u>NAMA</u> | <u>VILA</u> | <u>WISE</u> |
| Por1        | 42.05-41.28              | -8.73/-8.12               | 1/0/4          | 0/0/1       | 0/0/5       | 0/0/1       | 4/0/34      | 0/0/6       |
| Por2        | 38.87-38.68              | -7.30/-7.01               | -              | -           | -           | 0/0/3       | -           | -           |

**SPAIN (n = 155)**

| <u>Site</u> | <u>Latitudinal range</u> | <u>Longitudinal range</u> | <u>Species</u> |             |             |             |             |             |             |             |             |
|-------------|--------------------------|---------------------------|----------------|-------------|-------------|-------------|-------------|-------------|-------------|-------------|-------------|
|             |                          |                           | <u>COAU</u>    | <u>COGI</u> | <u>MAMO</u> | <u>NAAS</u> | <u>NAMA</u> | <u>VIAS</u> | <u>VILA</u> | <u>WISE</u> | <u>ZASC</u> |
| Sp1         | 43.70-41.98              | -8.86/-7.27               | 0/0/4          | -           | -           | 0/0/7       | 0/0/4       | -           | -           | 2/0/26      | -           |
| Sp2         | 43.07-42.17              | -6.72/-3.33               | 0/0/1          | 0/0/1       | -           | 1/0/2       | 0/0/1       | 1/0/23      | 0/0/29      | 0/0/19      | -           |
| Sp3         | 37.26-36.82              | -6.95/-6.26               | -              | 0/0/1       | -           | -           | -           | -           | -           | -           | 1/0/3       |
| Sp4         | 42.49-42.11              | -2.98/-2.21               | 0/0/1          | 0/0/1       | 0/0/1       | -           | 0/0/2       | 1/0/11      | 0/0/12      | -           | -           |
| Sp5         | 43.03-42.83              | -1.73/-1.39               | -              | -           | 0/0/1       | 0/0/1       | -           | 0/0/4       | -           | -           | -           |

**SWITZERLAND (n = 243)**

| <u>Site</u> | <u>Latitudinal range</u> | <u>Longitudinal range</u> | <u>Species</u> |             |             |             |             |             |             |             |
|-------------|--------------------------|---------------------------|----------------|-------------|-------------|-------------|-------------|-------------|-------------|-------------|
|             |                          |                           | <u>COAU</u>    | <u>HIVI</u> | <u>NAHE</u> | <u>NAMA</u> | <u>NATE</u> | <u>VIAS</u> | <u>VIBE</u> | <u>ZALO</u> |
| Sw1         | 46.28-45.84              | 8.53-8.98                 | -              | 2/3/11      | 4/3/15      | -           | 3/4/15      | -           | -           | 2/1/4       |
| Sw2         | 46.99-47.21              | 8.57-8.80                 | -              | -           | -           | 1/1/1       | 0/0/1       | -           | -           | -           |
| Sw3         | 46.98-46.94              | 8.27-8.33                 | 0/0/2          | -           | 0/0/1       | -           | 11/11/17    | 0/0/2       | -           | -           |
| Sw4         | 46.79-46.68              | 8.19-8.36                 | -              | -           | 0/0/3       | -           | -           | 0/0/1       | 0/0/3       | -           |
| Sw5         | 46.75-46.67              | 7.89-8.07                 | -              | -           | 0/0/2       | -           | 14/15/26    | 0/0/1       | -           | -           |
| Sw6         | 46.36-46.20              | 6.87-7.23                 | -              | 1/0/6       | -           | -           | -           | -           | -           | -           |
| Sw7         | 46.50-46.39              | 6.12-6.29                 | -              | 0/0/2       | -           | -           | -           | -           | -           | -           |

|      |             |           |   |        |          |       |         |       |       |   |
|------|-------------|-----------|---|--------|----------|-------|---------|-------|-------|---|
| Sw8  | 46.55-46.44 | 6.66-6.92 | - | 1/0/8  | -        | 0/0/2 | 11/0/16 | -     | -     | - |
| Sw9  | 46.90-46.74 | 6.53-6.75 | - | 1/1/13 | -        | -     | -       | 0/0/4 | -     | - |
| Sw10 | 47.03-46.94 | 6.67-6.85 | - | -      | -        | -     | -       | -     | 0/0/4 | - |
| Sw11 | 47.04-46.95 | 6.95-7.11 | - | 0/0/1  | 26/26/82 | -     | -       | -     | -     | - |

**UKRAINE (n = 66)**

| <u>Site</u> | <u>Latitudinal range</u> | <u>Longitudinal range</u> | <u>Species</u> |             |             |             |             |             |             |             |
|-------------|--------------------------|---------------------------|----------------|-------------|-------------|-------------|-------------|-------------|-------------|-------------|
|             |                          |                           | <u>COAU</u>    | <u>DOCA</u> | <u>ELSA</u> | <u>NANA</u> | <u>NATE</u> | <u>VIBE</u> | <u>VINI</u> | <u>VIRE</u> |
| Ukr1        | 51.22-51.02              | 30.58-30.98               | -              | -           | -           | -           | -           | 0/0/1       | -           | -           |
| Ukr2        | 47.89-47.73              | 29.30-29.59               | 0/0/1          | -           | -           | -           | -           | -           | -           | -           |
| Ukr3        | 46.72-46.60              | 31.03-31.27               | -              | 0/0/2       | -           | -           | -           | -           | -           | -           |
| Ukr4        | 47.26-47.06              | 31.89-32.14               | -              | 0/0/1       | -           | -           | -           | -           | -           | -           |
| Ukr5        | 46.37-46.07              | 33.13-33.49               | -              | 0/0/1       | 0/0/3       | 0/0/1       | -           | -           | -           | 0/0/6       |
| Ukr6        | 46.48-46.31              | 35.10-35.37               | -              | -           | -           | -           | 0/0/1       | -           | -           | -           |
| Ukr7        | 50.18-49.29              | 35.12-37.09               | 0/0/3          | -           | -           | 7/7/8       | -           | -           | 9/1/32      | 0/0/6       |

**Supplementary Table 3.** Coefficients from Bayesian hierarchical model for species-level *Ophidiomyces ophidiicola* prevalence, the pathogen that causes snake fungal disease, in Europe (coefficient  $\pm$  standard deviation (95% credible intervals)). The data were analyzed with a Bernoulli distribution and logit link including site as a population-level effect and species as a random effect. The model is parameterized in relation to the reference level or intercept site *fr8*, and each parameter represents the difference from this reference level. Exact location of sites is included in Table S2.

|                            | Estimate $\pm$ Standard Deviation (95% CI) |
|----------------------------|--------------------------------------------|
| Intercept, Site <i>fr8</i> | -3.36 $\pm$ 0.82 (-5.12,-1.92)             |
| Site <i>sw1</i>            | 0.91 $\pm$ 0.66 (-0.38,2.19)               |
| Site <i>sw11</i>           | 2.13 $\pm$ 0.78 (0.68,3.74)                |
| Site <i>aus2</i>           | -0.14 $\pm$ 0.85 (-1.87,1.46)              |
| Site <i>aus3</i>           | -9.1 $\pm$ 5.46 (-22.54,-1.76)             |
| Site <i>aus4</i>           | -8.8 $\pm$ 5.65 (-22.75,-1.06)             |
| Site <i>aus5</i>           | -1.12 $\pm$ 1.42 (-4.34,1.32)              |
| Site <i>cz1</i>            | -9.06 $\pm$ 5.61 (-22.65,-1.48)            |
| Site <i>cz2</i>            | -0.62 $\pm$ 0.75 (-2.08,0.83)              |
| Site <i>fr1</i>            | -8.78 $\pm$ 5.43 (-22.53,-1.79)            |
| Site <i>fr4</i>            | -8.54 $\pm$ 5.39 (-21.43,-1.24)            |
| Site <i>ger1</i>           | 1.01 $\pm$ 0.85 (-0.71,2.6)                |
| Site <i>ger4</i>           | -8.98 $\pm$ 5.59 (-22.49,-1.46)            |
| Site <i>ger6</i>           | -0.71 $\pm$ 0.94 (-2.6,1.11)               |
| Site <i>hun2</i>           | -8.37 $\pm$ 6.16 (-23.11,-0.08)            |
| Site <i>hun3</i>           | -8.58 $\pm$ 5.69 (-22.08,-1)               |
| Site <i>hun4</i>           | -0.52 $\pm$ 0.92 (-2.41,1.23)              |
| Site <i>hun7</i>           | -8.55 $\pm$ 5.9 (-22.85,-0.52)             |
| Site <i>pol1</i>           | -9.1 $\pm$ 5.69 (-23.02,-1.62)             |
| Site <i>pol4</i>           | -8.17 $\pm$ 5.79 (-22.13,-0.16)            |

|           |                           |
|-----------|---------------------------|
| Site pol5 | -8.64±5.73 (-22.02,-0.82) |
| Site pol7 | -9.43±5.27 (-22.47,-2.61) |
| Site pol8 | -0.47±0.74 (-1.98,0.96)   |
| Site por1 | -8.08±5.68 (-21.8,-0.22)  |
| Site sp1  | -8.17±5.76 (-21.97,-0.07) |
| Site sp2  | -8.41±5.77 (-22.02,-0.28) |
| Site sp4  | -7.68±5.98 (-21.82,0.9)   |
| Site sw3  | 1.95±0.8 (0.43,3.59)      |
| Site sw5  | 1.76±0.76 (0.28,3.28)     |
| Site sw8  | -8.9±5.57 (-22.37,-1.49)  |
| Site sw9  | -0.96±1.43 (-4.32,1.37)   |
| Site ukr5 | -7.63±6.41 (-22.88,1.33)  |
| Site ukr7 | 1.88±0.95 (0.14,3.84)     |



**Supplementary Table 4.** Coefficients from Bayesian hierarchical model for species-level *Ophidiomyces ophidiicola* prevalence, the pathogen that causes snake fungal disease, in Europe (coefficient  $\pm$  standard deviation (95% credible intervals)). The data were analyzed with a Bernoulli distribution and logit link including species as a population-level effect and site as a random effect (*Coronella austriaca* (COAU), *Dolichophis caspius* (DOCA), *Hierophis viridiflavus* (HIVI), *Natrix astreptophora* (NAAS), *Natrix helvetica* (NAHE), *Natrix natrix* (NANA), *Natrix maura* (NAMA), *Natrix tessellata* (NATE), *Vipera aspis* (VIAS), *Vipera berus* (VIBE), *Vipera latastei* (VILA), *Vipera nikolskii* (VINI), *Vipera renardi* (VIRE), *Vipera seoanei* (VISE), *Vipera ursini* (VIUR), *Zamenis longissimus* (ZALO)). The model is parameterized in relation to the reference level or intercept NATE, and each parameter represents the difference from this reference level.

|                  | Estimate $\pm$ Standard Deviation (95% CI) |
|------------------|--------------------------------------------|
| Intercept (NATE) | -2.8 $\pm$ 0.8 (-4.6,-1.42)                |
| Species COAU     | -3.69 $\pm$ 1.37 (-6.73,-1.43)             |
| Species DOCA     | -8.24 $\pm$ 5.76 (-21.88,-0.49)            |
| Species HIVI     | -0.65 $\pm$ 0.66 (-2,0.62)                 |
| Species NAAS     | -7.93 $\pm$ 6.02 (-22.23,0.8)              |
| Species NAHE     | -1.33 $\pm$ 0.66 (-2.69,-0.1)              |
| Species NAMA     | -8.79 $\pm$ 5.42 (-22.1,-1.4)              |
| Species NANA     | -0.17 $\pm$ 0.78 (-1.72,1.39)              |
| Species VIAS     | -9.31 $\pm$ 5.14 (-21.37,-2.21)            |
| Species VIBE     | -2.66 $\pm$ 1.34 (-5.53,-0.4)              |
| Species VILA     | -8.69 $\pm$ 5.5 (-21.92,-0.67)             |
| Species VINI     | -5.14 $\pm$ 1.62 (-8.82,-2.3)              |
| Species VIRE     | -10.19 $\pm$ 5.62 (-23.64,-2.52)           |
| Species VISE     | -8.43 $\pm$ 5.54 (-21.45,-0.2)             |
| Species VIUR     | -6.63 $\pm$ 6.31 (-20.54,3.33)             |
| Species ZALO     | -1.01 $\pm$ 0.63 (-2.27,0.14)              |

**Supplementary Table 5.** Coefficients from Bayesian hierarchical model for differences in severity of snake fungal disease (SFD) among species in Europe for individuals that were confirmed positive for the pathogen that causes SFD, *Ophidiomyces ophidiicola*, through quantitative polymerase chain reaction (qPCR) (coefficient  $\pm$  standard deviation (95% credible intervals)). The data were analyzed with a beta distribution that included site as random effect, and species as a population-level effect. The model is parameterized in relation to the reference level or intercept *Natrix tessellata* and each parameter represents the difference from this reference level.

|                                | Estimate $\pm$ Standard Deviation (95% CI) |
|--------------------------------|--------------------------------------------|
| Intercept <i>N. tessellata</i> | -5.43 $\pm$ 0.26 (-5.88,-4.8)              |
| species <i>Z. longissimus</i>  | 0.03 $\pm$ 0.46 (-0.85,0.98)               |
| species <i>N. helvetica</i>    | -0.29 $\pm$ 0.42 (-1.25,0.54)              |
| species <i>N. natrix</i>       | 0.32 $\pm$ 0.55 (-1.07,1.06)               |
| species <i>C. austriaca</i>    | 0.23 $\pm$ 1.03 (-2.3,1.71)                |
| species <i>H. viridiflavus</i> | -0.07 $\pm$ 0.5 (-1.14,0.82)               |

**Supplementary Table 6.** Alignment of representative sequences previously deposited in GenBank that correspond to the four internal transcribed spacer 2 (ITS2) region genotypes detected in our study.

|                          |                                                              |     |
|--------------------------|--------------------------------------------------------------|-----|
| Genotype_IB_KY474061     | GAAATGCGATAAGTAATGTGAATTGCAGAATTCGGTGAATCATCGAATCTTTGAACGCAC | 60  |
| Genotype_IIF_KX148658.1  | GAAATGCGATAAGTAATGTGAATTGCAGAATTCGGTGAATCATCGAATCTTTGAACGCAC | 60  |
| Genotype_IA_KY474059.1   | GAAATGCGATAAGTAATGTGAATTGCAGAATTCGGTGAATCATCGAATCTTTGAACGCAC | 60  |
| Genotype_IIDE_OL457490.1 | GAAATGCGATAAGTAATGTGAATTGCAGAATTCGGTGAATCATCGAATCTTTGAACGCAC | 60  |
|                          | *****                                                        |     |
| Genotype_IB_KY474061     | ATTGCGCCCCCTGGTATTCCGGGGGGCATGCCTGTCCGAGCGTCATTGCAACCCCCTCAA | 120 |
| Genotype_IIF_KX148658.1  | ATTGCGCCCCCTGGTATTCCGGGGGGCATGCCTGTCCGAGCGTCATTGCAACCCCCTCAA | 120 |
| Genotype_IA_KY474059.1   | ATTGCGCCCCCTGGTATTCCGGGGGGCATGCCTGTCCGAGCGTCATTGCAACCCCCTCAA | 120 |
| Genotype_IIDE_OL457490.1 | ATTGCGCCCCCTGGTATTCCGGGGGGCATGCCTGTCCGAGCGTCATTGCAACCCCCTCAA | 120 |
|                          | *****                                                        |     |
| Genotype_IB_KY474061     | GCCCGGCTTGTGTGTTGGGGGCGCCCGCCCGAAGTCTCGGGCGCGGGCCCCCCCCCAA   | 180 |
| Genotype_IIF_KX148658.1  | GCCCGGCTTGTGTGTTGGGGGCGCCCGCCCGAAGTCTCGGGCGCGGGCCCCCCCCCAA   | 180 |
| Genotype_IA_KY474059.1   | GCCCGGCTTGTGTGTTGGGGGCGCCCGCCCGAAGTCTCGGGCGCGGGCCC-CCCCCAA   | 179 |
| Genotype_IIDE_OL457490.1 | GCCCGGCTTGTGTGTTGGGGGCGCCCGCCCGAAGTCTCGGGCGCGGGCCC-CCCCCAA   | 179 |
|                          | ***** ****                                                   |     |
| Genotype_IB_KY474061     | ATGCAGTGGCGGCACCGAGTTCCTGGTGTCTGAGTGTATGGGAATCTGTTTCTGTCTCGC | 240 |
| Genotype_IIF_KX148658.1  | ATGCAGTGGCGGCACCGAGTTCCTGGTGTCTGAGTGTATGGGAATCTGTTTCTGTCTCGC | 240 |
| Genotype_IA_KY474059.1   | ATGCAGTGGCGGCACCGAGTTCCTGGTGTCTGAGTGTATGGGAATCTGTTTCTGTCTCGC | 239 |
| Genotype_IIDE_OL457490.1 | ATGCAGTGGCGGCACCGAGTTCCTGGTGTCTGAGTGTATGGGAATCTGTTTCTGTCTCGC | 239 |
|                          | *****                                                        |     |
| Genotype_IB_KY474061     | TCGAAGACCCGATCGGGCGCCCGTCGTCAACCCCC                          | 274 |
| Genotype_IIF_KX148658.1  | TCGAAGACCCGATCGGGCGCCCGTCGTCAACCCCC                          | 274 |
| Genotype_IA_KY474059.1   | TCGAAGACCCGATCGGGCGCCCGTCGTCAACCCCC                          | 273 |
| Genotype_IIDE_OL457490.1 | TCGAAGACCCGATCGGGCGCCCGTCGTCAACCCCC                          | 273 |
|                          | *****                                                        |     |

**Supplementary Table 7.** Bayesian model comparisons explaining *Ophidiomyces ophidiicola* prevalence across the landscape using the leave-one-out cross-validation (LOO).

| <b>Model comparison tested</b> | elpd_diff | se_diff | elpd_loo | se_elpd_loo | p_loo  | se_p_loo | looic   | se_looic |
|--------------------------------|-----------|---------|----------|-------------|--------|----------|---------|----------|
| Clade * Species + (1 Site)     | 0         | 0       | -235.892 | 16.458      | 23.244 | 3.945    | 471.784 | 32.915   |
| Clade + Species + (1 Site)     | -0.163    | 3.165   | -236.054 | 15.831      | 18.984 | 2.975    | 472.109 | 31.663   |
| Species + (1 Site)             | -0.759    | 3.571   | -236.651 | 15.965      | 19.284 | 3.259    | 473.302 | 31.931   |
| Clade + (1 Site)               | -15.941   | 9.42    | -251.833 | 14.088      | 11.754 | 1.082    | 503.666 | 28.176   |

**Supplementary Table 8.** Coefficients from Bayesian hierarchical model of interaction between species and clade explaining *Ophidiomyces ophidiicola* prevalence in Europe (coefficient  $\pm$  standard deviation (95% credible intervals)). The data were analyzed with a binomial distribution which included site as a random effect, and species and clade as population-level effects. The model is parameterized in relation to the reference level or intercept *Natrix tessellata* and each parameter represents the difference from this reference level.

|                                                   | Estimate $\pm$ Standard Deviation (95% CI) |
|---------------------------------------------------|--------------------------------------------|
| Intercept Clade Europe: <i>N. tessellata</i>      | -1.47 $\pm$ 0.66 (-2.86,-0.21)             |
| Clade North America: <i>N. tessellata</i>         | 1.15 $\pm$ 0.85 (-0.58,2.82)               |
| Species <i>N. helvetica</i>                       | 0.8 $\pm$ 1.22 (-1.54,3.46)                |
| Species <i>N. natrix</i>                          | 0.36 $\pm$ 0.94 (-1.45,2.28)               |
| Species <i>Z. longissimus</i>                     | -2.32 $\pm$ 1.05 (-4.57,-0.45)             |
| Clade North_America:species <i>N. helvetica</i>   | -2.68 $\pm$ 1.44 (-5.61,0.14)              |
| Clade North_America:species <i>N. natrix</i>      | -0.38 $\pm$ 1.27 (-2.93,2.12)              |
| Clade North_America:species <i>Z. longissimus</i> | 1.6 $\pm$ 1.29 (-0.74,4.34)                |

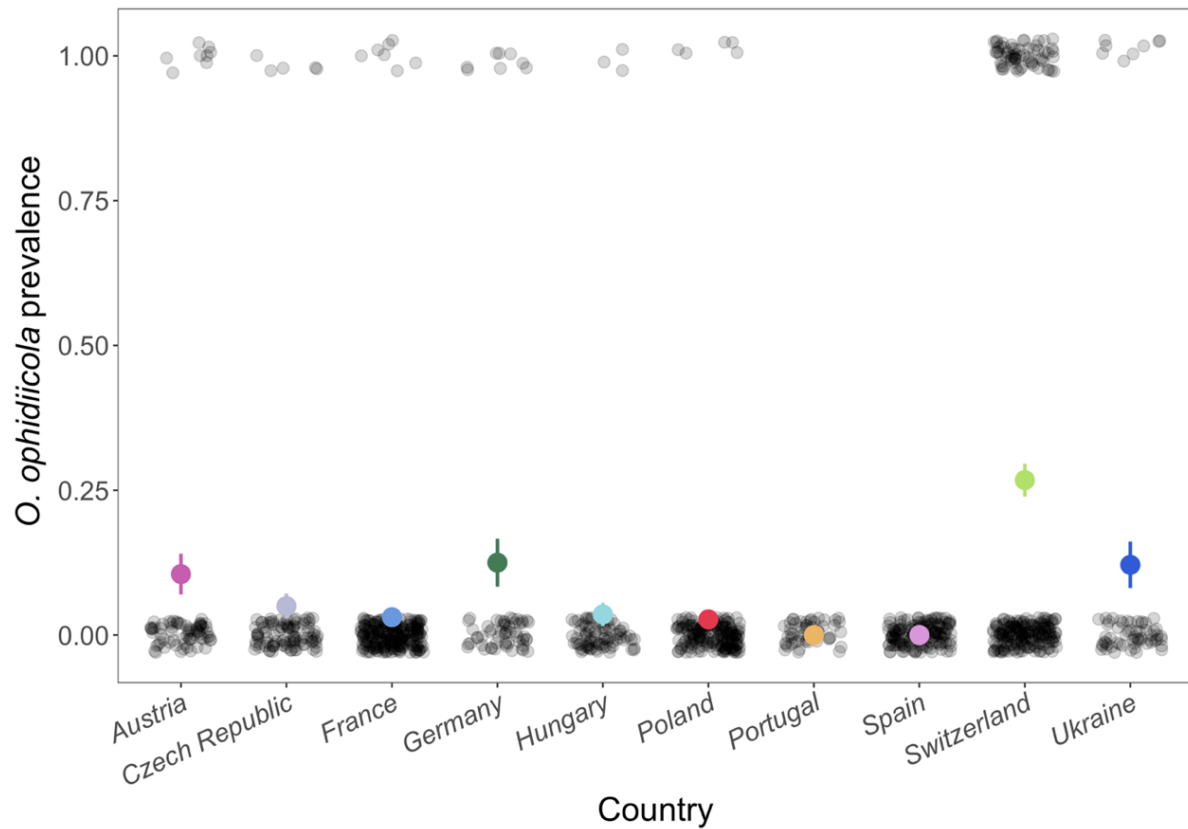

**Supplementary Figure 1.** Observed *Ophidiomyces ophidiicola* prevalence across all countries sampled using quantitative polymerase chain reaction (qPCR). Each transparent black point represents a single snake as being either negative (prevalence = 0) or positive (prevalence = 1). Color circles are mean prevalence  $\pm$  standard error for each country.

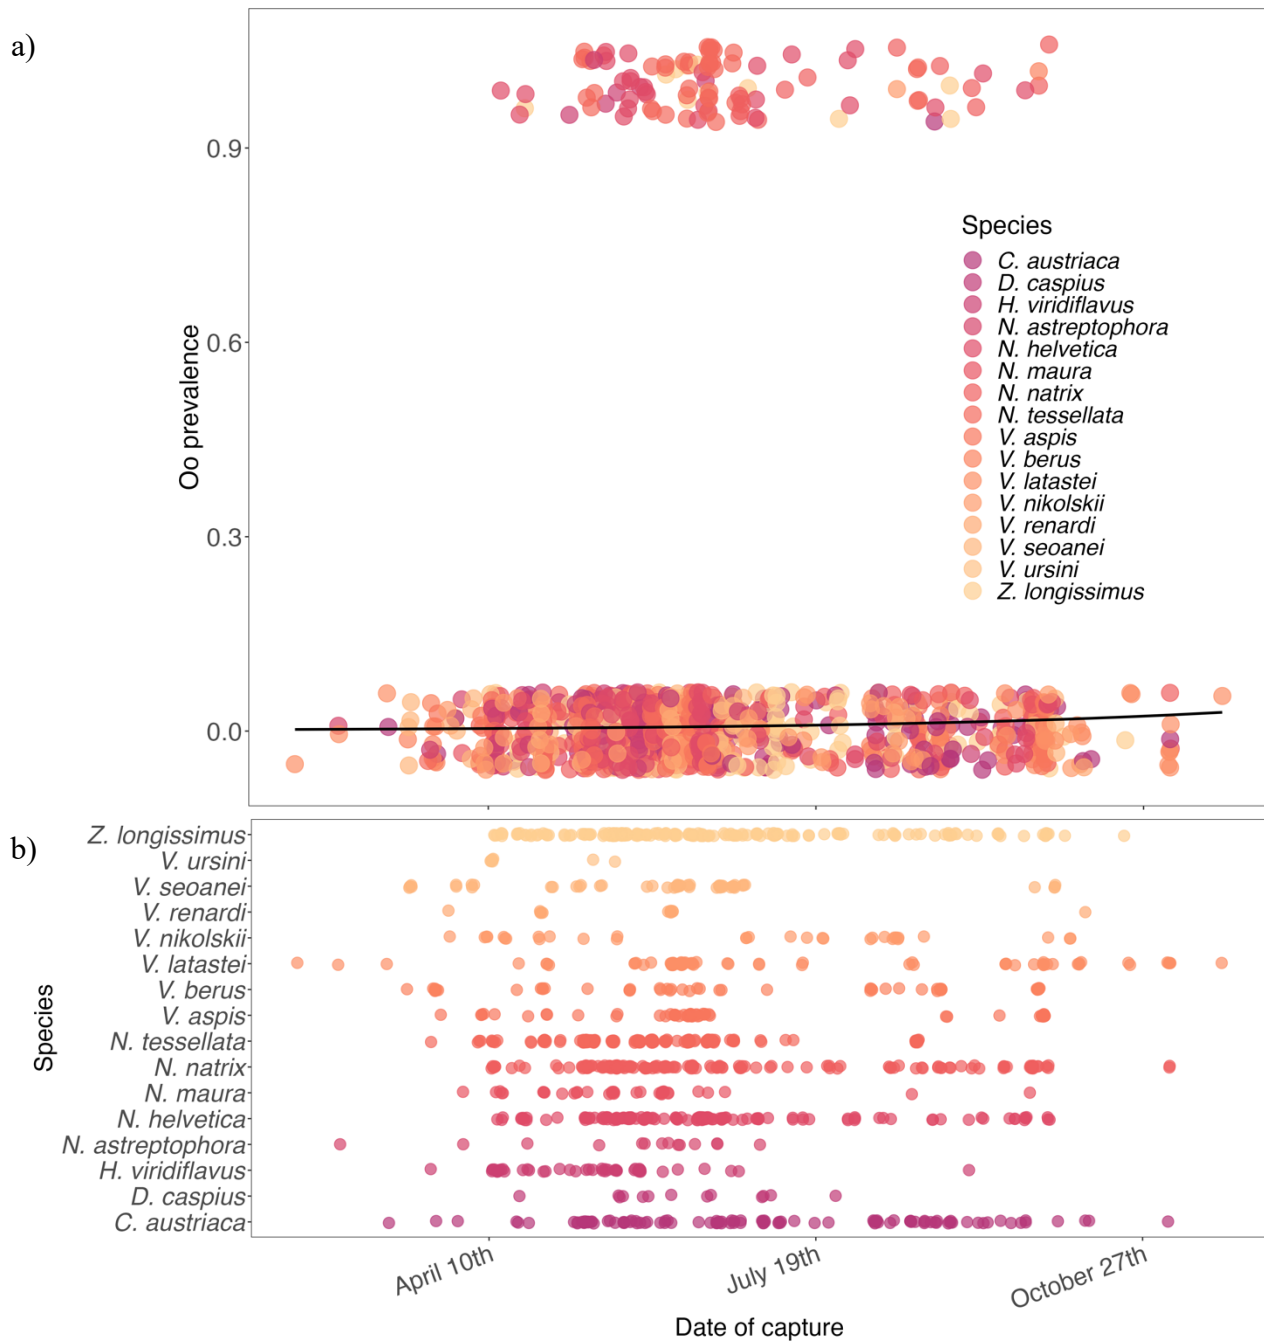

**Supplementary Figure 2. Seasonality of *Ophidiomyces ophidiicola* prevalence and snake captures.** a) Prevalence estimates over time. Color circles represent an individual detection (0|1) for a species, black line is the model fitted line b) and seasonality of species captures. Color circles represent an individual snake capture.

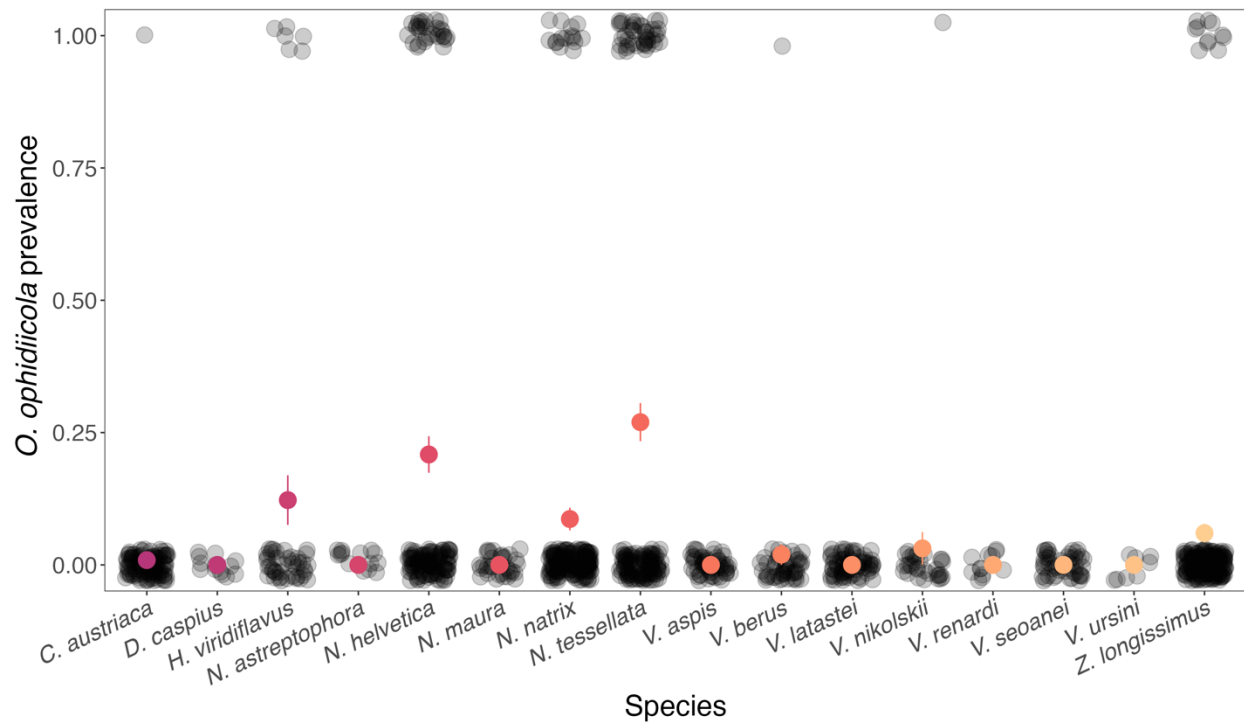

**Supplementary Figure 3.** Observed *Ophidiomyces ophidiicola* prevalence across all species sampled using quantitative polymerase chain reaction (qPCR), without the effect of site. Each transparent black point represents a single snake as being either negative (prevalence = 0) or positive (prevalence = 1). Color circles are mean prevalence  $\pm$  standard error for each species.

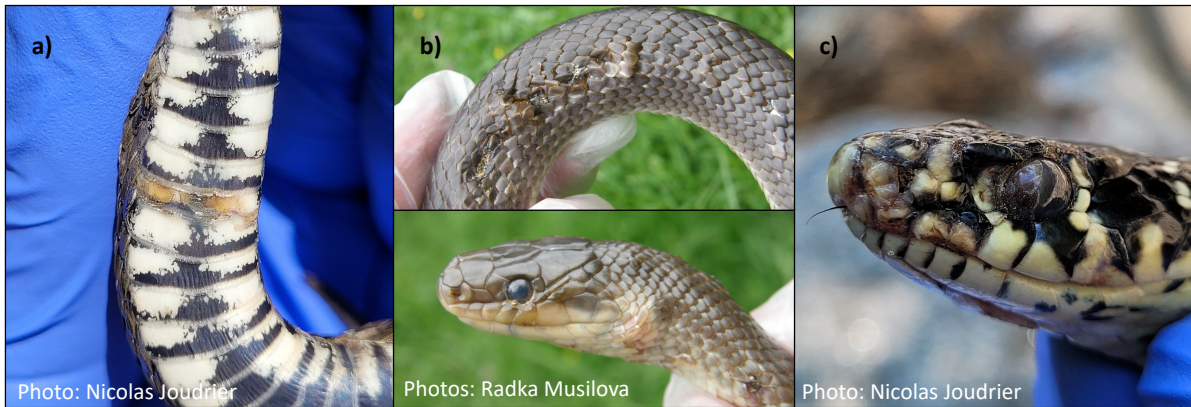

**Supplementary Figure 4.** Photos of lesions from snakes that were qPCR positive for *Ophidiomyces ophidiicola*. a) Photo of a ventral lesion on *Natrix tessellata* in Switzerland. b) Photo of lesions on the head and body of *Zamenis longissimus* in Czech Republic. c) Photo of a lesion on the head of *Hierophis viridiflavus* in Switzerland.



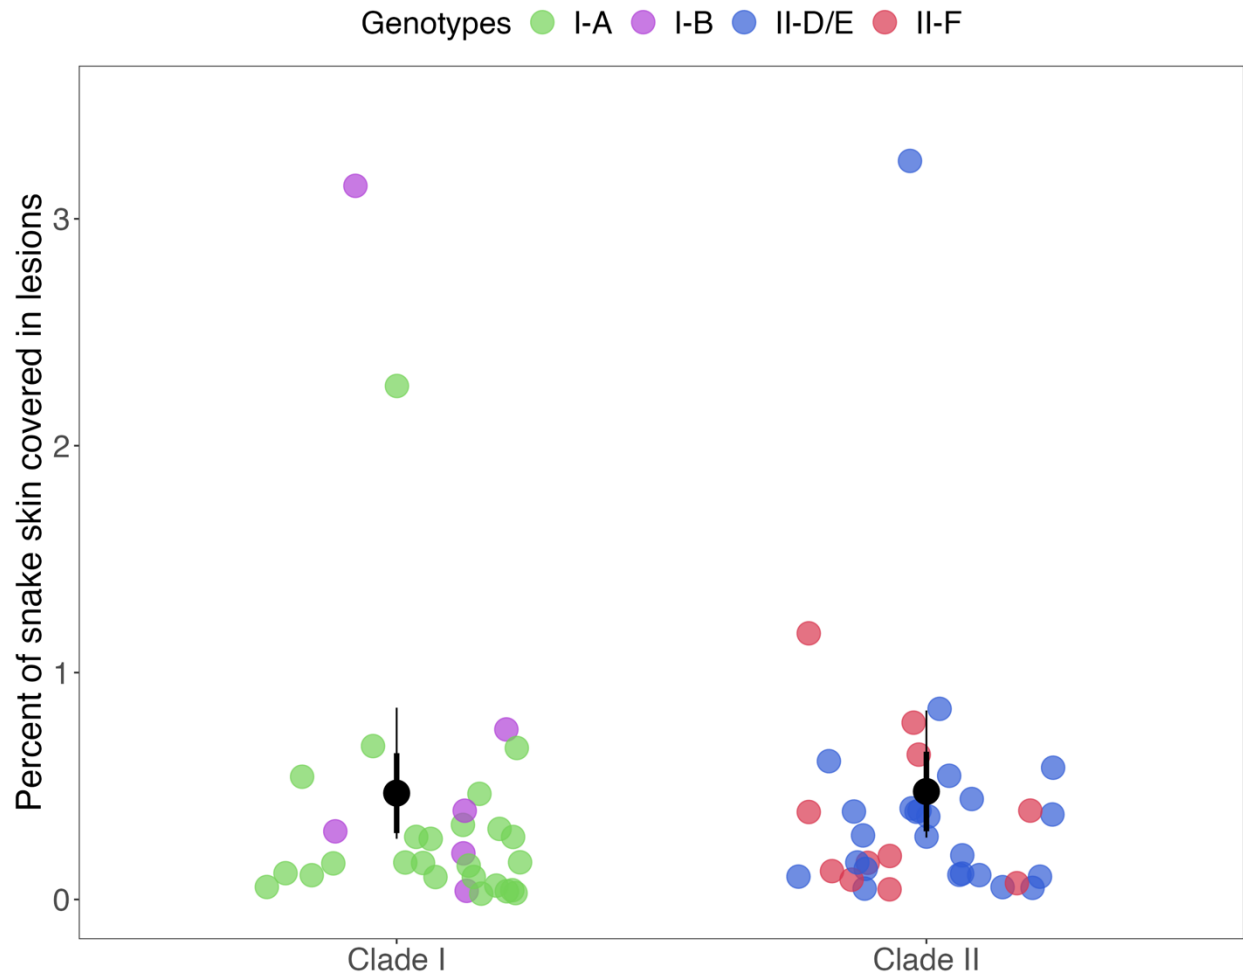

**Supplementary Figure 5.** Variation in disease severity (fraction of snake covered in lesions) by pathogen clade infecting the host. Each point is a single snake for which *Ophidiomyces ophidiicola* clade was determined, colors represent the different lineages of *O. ophidiicola*. The black circles and whiskers show the model predicted posterior mean,  $\pm$  standard deviation (thick lines), and 95% credible intervals (thin lines).
