# Supplementary material for: Contribution of host species and pathogen clade to snake fungal disease hotspots in Europe
Source: PubMed Central journal article supplement (PMC11006896; doi:10.1038/s42003-024-06092-x), 2024-04-10
Supplement: 42003_2024_6092_MOESM3_ESM.pdf [file 42003_2024_6092_MOESM3_ESM.pdf]

## Description of Additional Supplementary Files

**File name:** Supplementary Data 1

**Description:** The source data behind the graphs in the paper.
